# Supplementary material for: Neurofilament light chain and α-synuclein RT-QuIC as differential diagnostic biomarkers in parkinsonisms and related syndromes
Source: Springer Nature journal article supplement (doi:10.1038/s41531-021-00232-4), 2021-10-11
Supplement: MOESM1 [file 41531_2021_232_MOESM1_ESM.pdf]

## **Supplementary Materials for the manuscript:**

### **Neurofilament light chain and $\alpha$ -synuclein RT-QuIC as differential diagnostic biomarkers in parkinsonisms and related syndromes**

Corinne Quadalti, Giovanna Calandra-Buonaura, Simone Baiardi, Andrea Mastrangelo, Marcello Rossi, Corrado Zenesini, Giulia Giannini, Niccolò Candelise, Luisa Sambati, Barbara Polischi, Giuseppe Plazzi, Sabina Capellari, Pietro Cortelli, Piero Parchi.

## **Supplementary Methods**

### ***Sample collection***

EDTA plasma samples were collected, aliquoted, and stored at  $-80^{\circ}\text{C}$  according to standard procedures. CSF samples were obtained by lumbar puncture (LP) following a standard procedure, centrifuged in case of blood contamination (<2% of cases), divided into aliquots, and stored in polypropylene tubes at  $-80^{\circ}\text{C}$  until analysis.

### ***A/T/N classification***

We classified all cases with available CSF according to the A/T/N scheme, [1] as follow: amyloid positive (A+), if  $\text{A}\beta_{42/40}$  ratio  $<0.68$ ; tau positive (T+), if p-tau  $>58$  pg/ml; neurodegeneration positive (N+), if t-tau  $>450$  pg/ml.

### ***Statistical analysis and patient group comparisons.***

We used IBM SPSS Statistics version 24 (IBM, Armonk, NY, USA) and GraphPad Prism 8 (GraphPad Software, La Jolla, CA, USA) software. Depending on their distribution, data were presented as mean  $\pm$  standard deviation (SD) or median and interquartile range (IQR).

In both linear regression models and Cox regression analyses amyloid ratio and orthostatic hypotension were analysed as categorical parameters (presence or absence). Positive amyloid status was defined by a ratio  $<0.65$ , whereas the presence of orthostatic hypotension was defined by a drop in systolic blood pressure of  $\geq 20$  mmHg or diastolic blood pressure of  $\geq 10$  mmHg with assumption of an upright posture.[2]

In this study PD and PDD groups have been considered two different cohorts, except when evaluating the association with disease severity of cNfL and pNfL. We kept the two groups separate when assessing the diagnostic value of NfL because the presence or absence of cognitive decline makes a difference in the early diagnostic evaluation of these patients in the clinical setting. Moreover, PDD is by definition an evolutionary stage of PD with cognitive decline occurring at least one year after the onset of parkinsonism. In contrast, given that PDD represents an evolutionary stage of PD related to the spread of LB pathology and/or the association with AD pathology or other co-pathologies, we considered PD and PDD as a single entity when evaluating NfL association with disease severity.

## Supplementary References

- [1] Jack, CR Jr., et al. An unbiased descriptive classification scheme for Alzheimer disease biomarkers. *Neurology*, 87(5), 539-47, (2016).
- [2] Freeman, R., et al. Consensus statement on the definition of orthostatic hypotension, neurally mediated syncope and the postural tachycardia syndrome. *Clin. Auton. Res.* 21(2), 69-72, (2011).

**Supplementary Table 1.** Comparison of NfL levels and clinical/demographic features between MSA with predominant cerebellar ataxia (MSA-C) and MSA with predominant parkinsonism (MSA-P).

|                                              | MSA-C            | MSA-P            | p value |
|----------------------------------------------|------------------|------------------|---------|
| n <sup>1</sup>                               | 44               | 34               |         |
| Age, yrs                                     | 60.5±7.2         | 61.9±9.1         | 0.449   |
| Female, n (%)                                | 20 (45.5)        | 22 (64.7)        | 0.091   |
| Time between onset to sample collection, mo. | 43.0 (32.0-61.3) | 50.5 (28.0-68.3) | 0.539   |
| CSF NfL (pg/ml)                              | 3151 (2153-4487) | 3119 (1932-4281) | 0.567   |
| Plasma NfL (pg/ml)                           | 29.1 (22.3-38.6) | 35.8 (26.8-47.6) | 0.084   |
| Orthostatic hypotension (%)                  | 21 (47.7)        | 26 (68.4)        | 0.059   |
| Aβ42/40 <0.65 (%)                            | 5 (11.9)         | 2 (6.9)          | 0.693   |

Age is expressed as mean±SD, while the other continuous variable as median (interquartile range). CSF NfL was analysed in 38 MSA-C and 29 MSA-P, while plasma NfL in 30 MSA-C and 23 MSA P. <sup>1</sup>Two patients were excluded from the analysis because of the equal severity of parkinsonian and cerebellar features.

**Supplementary Table 2.** Comparison of NfL levels and clinical/demographic features between MSA presenting with isolated autonomic failure and MSA with other symptoms/signs at onset.

| Clinical presentation                        | isolate autonomic failure | other symptoms/signs | p value |
|----------------------------------------------|---------------------------|----------------------|---------|
| n                                            | 18                        | 62                   |         |
| Age, yrs                                     | 61.6±6.9                  | 61.0±8.4             | 0.784   |
| Female, n (%)                                | 9 (50.0)                  | 34 (54.8)            | 0.792   |
| Time between onset to sample collection, mo. | 45.5 (34.5-68.0)          | 43.0 (25.8-67.5)     | 0.619   |
| CSF NfL (pg/ml)                              | 3249 (2408-4604)          | 3009 (1995-4266)     | 0.618   |
| Plasma NfL (pg/ml)                           | 27.6 (23.9-24.5)          | 35.1 (24.5-41.5)     | 0.251   |

|                                              |           |           |       |
|----------------------------------------------|-----------|-----------|-------|
| <b>MSA-C/MSA-P (%)</b>                       | 61.1/38.9 | 55.0/45.0 | 0.788 |
| <b>A<math>\beta</math>42/40 &lt;0.65 (%)</b> | 13.3      | 9.4       | 0.645 |

Age is expressed as mean $\pm$ SD, while the other continuous variable as median (interquartile range). CSF NfL was analyzed in 15 MSA-isolate AF and 53 MSA-other symptoms/signs at onset, while plasma NfL in 12 MSA-isolate AF and 43 MSA-other symptoms/signs at onset.

**Supplementary Table 3.** Comparison of NfL levels and clinical/demographic features in MSA between early (<3 years from onset) and late disease stages.

|                                                     | <b>MSA early<br/>(<math>\leq</math>3 yrs)</b> | <b>MSA late<br/>(<math>&gt;</math>3 yrs)</b> | <b>p value</b> |
|-----------------------------------------------------|-----------------------------------------------|----------------------------------------------|----------------|
| <b>n</b>                                            | 30                                            | 50                                           |                |
| <b>Age, yrs</b>                                     | 59.3 $\pm$ 7.8                                | 62.3 $\pm$ 8.0                               | 0.108          |
| <b>Female, n (%)</b>                                | 13 (43.3)                                     | 30 (60.0)                                    | 0.149          |
| <b>Time between onset to sample collection, mo.</b> | 25.0 (20.3-32.3)                              | 59.0 (45.3-72.8)                             | <0.0001        |
| <b>CSF NfL (pg/ml)</b>                              | 3098 (2018-4520)                              | 3075 (2118-4249)                             | 0.768          |
| <b>Plasma NfL (pg/ml)</b>                           | 31.1 (21.3-37.9)                              | 34.6 (25.2-42.3)                             | 0.393          |
| <b>Orthostatic hypotension (%)</b>                  | 22 (73.3)                                     | 38 (79.2)                                    | 0.552          |
| <b>A<math>\beta</math>42/40 &lt;0.65 (%)</b>        | 2 (7.7)                                       | 5 (11.9)                                     | 0.699          |

Age is expressed as mean $\pm$ SD, while the other continuous variable as median (interquartile range). CSF NfL was analysed in 26 MSA early and 42 MSA late, while plasma NfL in 17 MSA early and 38 MSA late.

**Supplementary Table 4.** Summary of the results of the cNfL and  $\alpha$ -syn RT-QuIC combined analysis between diagnostic groups.

| <b>PD vs MSA</b>                        |          | <b>PD Diagnosis</b> |          | <b>PD vs PSP/CBS</b>                    |          | <b>PD Diagnosis</b> |          | <b>PD vs APDs</b>                       |          | <b>PD Diagnosis</b> |          |
|-----------------------------------------|----------|---------------------|----------|-----------------------------------------|----------|---------------------|----------|-----------------------------------------|----------|---------------------|----------|
|                                         |          | <b>Y</b>            | <b>N</b> |                                         |          | <b>Y</b>            | <b>N</b> |                                         |          | <b>Y</b>            | <b>N</b> |
| <b>cNfL + <math>\alpha</math>-syn-s</b> | <b>+</b> | 115                 | 3        | <b>cNfL + <math>\alpha</math>-syn-s</b> | <b>+</b> | 113                 | 0        | <b>cNfL + <math>\alpha</math>-syn-s</b> | <b>+</b> | 114                 | 5        |
|                                         | <b>-</b> | 1                   | 65       |                                         | <b>-</b> | 3                   | 52       |                                         | <b>-</b> | 2                   | 115      |
| <b>TOT</b>                              |          | 116                 | 68       | <b>TOT</b>                              |          | 116                 | 52       | <b>TOT</b>                              |          | 116                 | 120      |
| <b>ROC AUC [95% CI]</b>                 |          | 0,974 [0,948-0,999] |          | <b>ROC AUC [95% CI]</b>                 |          | 0,987 [0,973-1,000] |          | <b>ROC AUC [95% CI]</b>                 |          | 0,971 [0,949-0,992] |          |

List of abbreviations: PD Parkinson's disease; MSA multiple system atrophy; PSP/CBS progressive supranuclear palsy/corticobasal syndrome; APDs atypical parkinsonisms (i.e. MSA + PSP/CBS).

cNfL: CSF Neurofilament light chain;  $\alpha$ -syn-s  $\alpha$ -synuclein seeding activity.

Y patients with positive PD diagnosis; N patients with non-PD diagnosis (i.e. MSA, PSP/CBS, APDs).

“+” positive  $\alpha$ -syn-s OR cNfL value below the selected cut-off for the combination; “-“ negative  $\alpha$ -syn-s AND cNfL value above the selected cut-off for the combination (see Table 3 of the manuscript for cut-offs values).

ROC AUC [95% CI] indicates the area under the ROC curve of the combined tests, with 95% confidence intervals.

**Supplementary Table 5.** Details regarding patients with discrepant results in PD vs APDs discrimination using both cNfL and  $\alpha$ -syn RT-QuIC assays.

| <b>Diagnostic group</b> | <b>Final diagnosis</b>    | <b>Age at onset</b> | <b>Time onset-LP</b> | <b>CSF NfL (pg/ml)</b> | <b><math>\alpha</math>-syn RT-QuIC result</b> | <b>Clinical features</b>                                                                                                                                    | <b>Relevant diagnostic tests</b> |
|-------------------------|---------------------------|---------------------|----------------------|------------------------|-----------------------------------------------|-------------------------------------------------------------------------------------------------------------------------------------------------------------|----------------------------------|
| <b>PD</b>               | PD probable               | 69                  | 38                   | 691                    | Negative                                      | Unilateral rest tremor accompanied by rigidity and bradykinesia. After 7 years from onset, falls and dysphagia. Unclear response to levodopa. No red flags. | MRI: mild vascular changes.      |
| <b>PD</b>               | PD probable               | 45                  | 25                   | 804                    | Negative                                      | Rest tremor at onset. Subjective response to Levodopa. No red flags.                                                                                        | DatScan: reduced BG uptake.      |
| <b>PD</b>               | Clinically established PD | 64                  | 33                   | 2674                   | Negative                                      | Hyposmia. Unilateral bradykinesia and rigidity. Beneficial response to levodopa. Urinary urgency. No red flags.                                             | MRI: moderate vascular changes.  |
| <b>MSA</b>              | MSA-P probable            | 57                  | 71                   | 3733                   | Positive                                      | Parkinsonism poorly responsive to levodopa and early falls (<1 year). Then cerebellar and pyramidal signs. Urinary                                          | MRI: cerebellar atrophy          |

|                |                   |    |    |      |          |                                                                                                                                                        |                                                                                          |
|----------------|-------------------|----|----|------|----------|--------------------------------------------------------------------------------------------------------------------------------------------------------|------------------------------------------------------------------------------------------|
|                |                   |    |    |      |          | incontinence, orthostatic hypotension. RBD. Tracheostomy because of respiratory arrest during sleep.                                                   |                                                                                          |
| <b>MSA</b>     | MSA-C probable    | 66 | 74 | 2712 | Positive | Onset with cerebellar sign, then orthostatic hypotension, parkinsonism and pyramidal signs. RBD. Stridor. Urinary incontinence.                        | DatScan: reduced BG uptake; MIBG: abnormal adrenergic innervation                        |
| <b>MSA</b>     | MSA-C probable    | 67 | 59 | 4608 | Positive | Isolated autonomic failure (orthostatic hypotension, urinary incontinence) at onset, then parkinsonism, cerebellar and pyramidal signs. RBD. Stridor.  | MRI: cerebellar atrophy; DatScan: reduced BG uptake; MIBG: normal adrenergic innervation |
| <b>PSP/CBS</b> | PSP-RS/P probable | 59 | 67 | 596  | Negative | Axial-predominant, akinetic-rigid parkinsonism, early falls. Then vertical gaze palsy, gait freezing, pyramidal signs, myoclonic jerks, and dysphagia. | MRI: vascular changes, fronto-temporal atrophy; DatScan: reduced BG uptake               |
| <b>PSP/CBS</b> | PSP-RS/P probable | 70 | 75 | 600  | Negative | Axial-predominant, akinetic-rigid parkinsonism poorly responsive to levodopa,                                                                          | MRI: mild vascular changes; DatScan:                                                     |

|  |  |  |  |  |  |                                                                                                                                |                   |
|--|--|--|--|--|--|--------------------------------------------------------------------------------------------------------------------------------|-------------------|
|  |  |  |  |  |  | falls (<1 years), gait freezing, vertical gaze palsy, hypophonia, dysarthria, dysphagia, ideomotor apraxia, cervical dystonia. | reduced BG uptake |
|--|--|--|--|--|--|--------------------------------------------------------------------------------------------------------------------------------|-------------------|

Discrepant results are highlighted in bold. Age is expressed in years, while the time between onset to lumbar puncture in months. List of abbreviations: LP, lumbar puncture; BG, basal ganglia; RBD, REM-sleep behavior disorder; MRI, magnetic resonance imaging; MIBG, metaiodobenzylguanidine.

**Supplementary Table 6.** Sensitivity and specificity of the NfL and  $\alpha$ -syn RT-QuIC assay comparisons between PDD alone, and PD/PDD, versus atypical parkinsonisms.

| <b>Diagnostic Group</b>  | <b>Biomarker</b> | <b>NfL cut-off (pg/ml)</b> | <b>+/- <sup>1</sup></b> | <b>Sens. (%) [95% CI]</b> | <b>Spec. (%) [95% CI]</b> |
|--------------------------|------------------|----------------------------|-------------------------|---------------------------|---------------------------|
| <b>PD/PDD vs MSA</b>     | cNfL             | 1417                       | 145/7 vs 1/67           | 95.4 [90.8-97.8]          | 98.5 [92.1-99.9]          |
|                          | pNfL             | 17.43                      | 71/13 vs 2/53           | 96.4 [87.7-99.4]          | 84.5 [75.3-90.7]          |
|                          | $\alpha$ -syn-s  | NA                         | 142/10 vs 3/65          | 93.4 [88.2-96.8]          | 95.6 [87.6-99.1]          |
| <b>PD/PDD vs PSP/CBS</b> | cNfL             | 1057                       | 135/17 vs 10/42         | 80.8 [68.1-89.2]          | 88.8 [82.8-92.9]          |
|                          | pNfL             | 17.56                      | 72/12 vs 6/35           | 85.4 [71.6-93.1]          | 85.7 [76.7-91.6]          |
|                          | $\alpha$ -syn-s  | NA                         | 142/10 vs 0/52          | 93.4 [88.2-96.8]          | 100 [93.2-100.0]          |
| <b>PD/PDD vs APDs</b>    | cNfL             | 1124                       | 138/14 vs 13/107        | 90.8 [85.1-94.4]          | 89.2 [82.3-93.6]          |
|                          | pNfL             | 17.56                      | 72/12 vs 9/87           | 85.7 [76.7-91.6]          | 90.6 [83.1-95.0]          |
|                          | $\alpha$ -syn-s  | NA                         | 142/10 vs 3/117         | 93.4 [88.2-96.8]          | 97.5 [92.9-99.5]          |
| <b>PDD vs MSA</b>        | cNfL             | 1417                       | 34/2 vs 1/67            | 94.4 [81.9-99.0]          | 98.5 [92.1-99.9]          |
|                          | pNfL             | 17.58                      | 16/6 vs 3/52            | 94.6 [85.2-98.5]          | 72.7 [51.9-86.9]          |
|                          | $\alpha$ -syn-s  | NA                         | 36/0 vs 3/65            | 100 [90.3-100.0]          | 95.6 [87.6-99.1]          |
| <b>PDD vs PSP/CBS</b>    | cNfL             | 1297                       | 33/3 vs 16/36           | 69.2 [55.7-80.1]          | 91.7 [78.2-97.1]          |

|                    |                 |       |                |                  |                  |
|--------------------|-----------------|-------|----------------|------------------|------------------|
|                    | pNfL            | 17.56 | 16/6 vs 6/35   | 85.4 [71.6-93.1] | 72.7 [51.9-86.9] |
|                    | $\alpha$ -syn-s | NA    | 36/0 vs 0/52   | 100 [90.3-100.0] | 100 [93.2-100.0] |
| <b>PDD vs APDs</b> | cNfL            | 1364  | 34/2 vs 20/100 | 94.4 [81.9-99.0] | 83.3 [75.7-88.9] |
|                    | pNfL            | 17.56 | 16/6 vs 9/87   | 90.6 [83.1-95.0] | 72.7 [51.9-86.9] |
|                    | $\alpha$ -syn-s | NA    | 36/0 vs 3/117  | 100 [90.3-100.0] | 97.5 [92.9-99.5] |

List of abbreviations: PD, Parkinson’s disease; MSA, multiple system atrophy; PSP/CBS, progressive supranuclear palsy/corticobasal syndrome; APDs, atypical parkinsonisms (MSA + PSP/CBS); Sens., sensitivity; Spec., specificity.

<sup>1</sup> “+” for  $\alpha$ -syn seeds indicates a positive seeding reaction in the RT-QuIC analysis, while it means “below the cut-off” for the NfL assay. Conversely, “-“ for  $\alpha$ -syn seeds indicates a negative seeding reaction in the RT-QuIC analysis, and a “above the cut-off” value of NfL.

**Supplementary Table 7.** Associations between NfL values and clinical parameters (univariate model).

| <b>Diagnostic group</b> | <b>NfL source</b> | <b>Coefficient</b> | <b>Time onset to LP</b> | <b>MMSE</b>  | <b>Hoehn &amp; Yahr</b> | <b>UPDRS-III</b> | <b>Orthostatic hypotension</b> | <b>Amyloid ratio<sup>1</sup></b> |
|-------------------------|-------------------|--------------------|-------------------------|--------------|-------------------------|------------------|--------------------------------|----------------------------------|
| <b>PD/PDD</b>           | CSF               | B                  | 0.002                   | -0.037       | 0.243                   | 0.014            | 0.217                          | 0.365                            |
|                         |                   | 95% CI             | 0.001-0.003             | -0.059-0.015 | 0.130-0.356             | 0.006-0.022      | 0.021-0.413                    | 0.141-0.590                      |
|                         |                   | SE                 | 0.001                   | 0.011        | 0.057                   | 0.004            | 0.099                          | 0.114                            |
|                         |                   | Beta               | 0.219                   | -0.281       | 0.378                   | 0.353            | 0.192;                         | 0.254                            |
|                         |                   | P value            | <b>0.007</b>            | <b>0.001</b> | <b>&lt;0.0001</b>       | <b>0.001</b>     | <b>0.030</b>                   | <b>0.002</b>                     |
|                         | Plasma            | B                  | 0.001                   | -0.400       | 0.200                   | 0.009            | 0.362                          | 0.418                            |
|                         |                   | 95% CI             | -0.001-0.003            | -0.064--     | 0.082-0.319             | 0.001-0.017      | 0.113-0.610                    | 0.155-0.681                      |
|                         |                   | SE                 | 0.001                   | 0.016        | 0.059                   | 0.004            | 0.124                          | 0.132                            |
|                         |                   | Beta               | 0.087                   | 0.012        | 0.389                   | 0.309            | 0.326                          | 0.333                            |
|                         |                   | P value            | 0.433                   | -0.356       | <b>0.001</b>            | <b>0.022</b>     | <b>0.005</b>                   | <b>0.002</b>                     |
| <b>MSA</b>              | CSF               | B                  | -0.002                  | 0.001        | 0.13                    | -0.011           | 0.202                          | 0.062                            |
|                         |                   | 95% CI             | -0.006-0.002            | -0.060-0.062 | -0.029-0.054            | -0.030-0.008     | -0.062-0.466                   | -0.314-0.438                     |
|                         |                   | SE                 | 0.002                   | 0.030        | 0.021                   | 0.009            | 0.132                          | 0.188                            |
|                         |                   | Beta               | -0.117                  | 0.004        | 0.082                   | -0.327           | 0.186                          | 0.040                            |
|                         |                   | P value            | 0.347                   | 0.976        | 0.551                   | 0.234            | 0.131                          | 0.744                            |
|                         | Plasma            | B                  | 0.002                   | -0.061       | 0.016                   | 0.01             | 0.337                          | -0.169                           |
|                         |                   | 95% CI             | -0.002-0.005            | -0.144-0.022 | -0.027-0.058            | -0.017-0.019     | 0.014-0.660                    | -0.616-0.277                     |
|                         |                   | SE                 | 0.002                   | 0.041        | 0.021                   | 0.008            | 0.161                          | 0.221                            |
|                         |                   | Beta               | 0.111                   | -0.229       | 0.111                   | 0.049            | 0.282                          | -0.119                           |
|                         |                   |                    |                         |              |                         |                  |                                |                                  |

|                |        |         |              |              |              |              |              |              |
|----------------|--------|---------|--------------|--------------|--------------|--------------|--------------|--------------|
|                |        | P value | 0.430        | 0.144        | 0.461        | 0.885        | <b>0.041</b> | 0.448        |
| <b>PSP/CBS</b> | CSF    | B       | 0.001        | 0.001        | 0.202        | 0.005        | -0.126       | 0.502        |
|                |        | 95% CI  | -0.004-0.006 | -0.035-0.037 | -0.091-0.494 | -0.008-0.018 | -1.258-1.007 | -0.001-1.006 |
|                |        | SE      | 0.003        | 0.018        | 0.143        | 0.006        | 0.552        | 0.251        |
|                |        | Beta    | 0.060        | 0.008        | 0.245        | 0.198        | -0.044       | 0.273        |
|                |        | P value | 0.672        | 0.958        | 0.170        | 0.463        | 0.822        | 0.051        |
|                | Plasma | B       | -0.003       | -0.035       | 0.176        | 0.013        |              | 0.229        |
|                |        | 95% CI  | -0.008-0.002 | -0.062--     | -0.040-0.392 | -0.007-0.033 | -            | -0.385-0.844 |
|                |        | SE      | 0.002        | 0.008        | 0.105        | 0.009        |              | 0.302        |
|                |        | Beta    | -0.218       | 0.013        | 0.325        | 0.439        |              | 0.131        |
|                |        | P value | 0.176        | -0.407       | 0.105        | 0.177        |              | 0.453        |
|                |        |         | 0.013        |              |              |              |              |              |
| <b>DLB</b>     | CSF    | B       | <0.001       | -0.006       | 0.025        | -0.001       | 0.185        | 0.106        |
|                |        | 95% CI  | -0.001-0.002 | -0.034-0.022 | -0.213-0.262 | -0.029-0.027 | -0.261-0.632 | -0.160-0.373 |
|                |        | SE      | 0.001        | 0.014        | 0.117        | 0.013        | 0.219        | 0.133        |
|                |        | Beta    | 0.015        | -0.052       | 0.035        | -0.014       | 0.148        | 0.101        |
|                |        | P value | 0.907        | 0.693        | 0.835        | 0.952        | 0.404        | 0.428        |
|                | Plasma | B       | 0.001        | 0.004        | 0.005        | -0.020       | 0.168        | 0.220        |
|                |        | 95% CI  | -0.002-0.005 | -0.048-0.055 | -0.354-0.363 | -0.065-0.024 | -0.578-0.915 | -0.273-0.714 |
|                |        | SE      | 0.002        | 0.025        | 0.171        | 0.020        | 0.352        | 0.242        |
|                |        | Beta    | 0.124        | 0.028        | 0.006        | -0.291       | 0.119        | 0.161        |
|                |        | P value | 0.493        | 0.881        | 0.978        | 0.335        | 0.640        | 0.370        |

List of abbreviations: PD Parkinson's disease; PDD PD dementia; DLB dementia with Lewy bodies; MSA multiple system atrophy; PSP/CBS progressive supranuclear palsy/corticobasal syndrome; LP lumbar puncture; MMSE Mini-mental state examination; UPDRS Unified Parkinson's Disease Rating Scale.

<sup>1</sup>Amyloid ratio evaluated as A $\beta$ 42/40 <0.65 (presence or absence).

**Supplementary Table 8.** Associations between NfL values and clinical parameters (adjusted for age).

| Diagnostic Group | NfL source | Coefficient | Time onset to LP | MMSE         | Hoehn & Yahr | UPDRS-III    | Orthostatic hypotension | Amyloid ratio <sup>1</sup> |
|------------------|------------|-------------|------------------|--------------|--------------|--------------|-------------------------|----------------------------|
| <b>PD/PDD</b>    | CSF        | B           | 0.001            | -0.017       | 0.143        | 0.022        | 0.004                   | 0.166                      |
|                  |            | 95% CI      | -0.001-0.002     | -0.036-0.003 | 0.036-0.249  | 0.014-0.029  | -0.175-0.182            | -0.034-0.366               |
|                  |            | SE          | 0.001            | 0.010        | 0.054        | 0.004        | 0.090                   | 0.101                      |
|                  |            | Beta        | 0.061            | -0.125       | 0.222        | 0.215        | 0.003                   | 0.116                      |
|                  |            | P value     | 0.369            | 0.101        | <b>0.009</b> | <b>0.019</b> | 0.968                   | 0.102                      |
|                  | Plasma     | B           | -0.001           | -0.020       | 0.090        | 0.003        | 0.140                   | 0.188                      |
|                  |            | 95% CI      | -0.002-0.001     | -0.042-0.001 | -0.019-0.199 | -0.003-0.010 | -0.079-0.359            | -0.050-0.427               |
|                  |            | SE          | 0.001            | 0.011        | 0.055        | 0.003        | 0.110                   | 0.120                      |



|                |        |         |              |              |              |              |              |              |
|----------------|--------|---------|--------------|--------------|--------------|--------------|--------------|--------------|
|                |        | Beta    | -0.086       | -0.183       | 0.174        | 0.116        | 0.126        | 0.150        |
|                |        | P value | 0.363        | 0.062        | 0.105        | 0.303        | 0.207        | 0.119        |
| <b>MSA</b>     | CSF    | B       | -0.002       | 0.012        | 0.015        | -0.016       | 0.203        | 0.069        |
|                |        | 95% CI  | -0.006-0.002 | -0.053-0.078 | -0.027-0.057 | -0.038-0.006 | -0.063-0.469 | -0.335-0.474 |
|                |        | SE      | 0.002        | 0.008        | 0.021        | 0.010        | 0.133        | 0.202        |
|                |        | Beta    | -0.117       | 0.056        | 0.099        | -0.484       | 0.187        | 0.045        |
|                |        | P value | 0.349        | 0.706        | 0.478        | 0.130        | 0.132        | 0.733        |
|                | Plasma | B       | 0.002        | -0.091       | 0.013        | -0.001       | 0.336        | -0.213       |
|                |        | 95% CI  | -0.002-0.005 | -0.182-0.000 | -0.030-0.056 | -0.023-0.022 | 0.010-0.662  | -0.700-0.274 |
|                |        | SE      | 0.002        | 0.045        | 0.021        | 0.010        | 0.162        | 0.241        |
|                |        | Beta    | 0.114        | -0.342       | 0.093        | -0.033       | 0.281        | -0.150       |
|                |        | P value | 0.421        | 0.050        | 0.546        | 0.939        | 0.043        | 0.382        |
| <b>PSP/CBS</b> | CSF    | B       | 0.001        | 0.007        | 0.188        | 0.002        | -0.257       | 0.442        |
|                |        | 95% CI  | -0.004-0.006 | -0.030-0.044 | -0.113-0.488 | -0.013-0.016 | -1.315-0.801 | -0.065-0.950 |
|                |        | SE      | 0.003        | 0.018        | 0.147        | 0.007        | 0.515        | 0.253        |
|                |        | Beta    | 0.062        | 0.057        | 0.228        | 0.074        | -0.090       | 0.240        |
|                |        | P value | 0.657        | 0.703        | 0.212        | 0.802        | 0.622        | 0.086        |
|                | Plasma | B       | -0.004       | -0.024       | 0.181        | 0.008        |              | -0.072       |
|                |        | 95% CI  | -0.008-0.001 | -0.051-0.002 | -0.014-0.376 | -0.010-0.027 |              | -0.603-0.459 |
|                |        | SE      | 0.002        | 0.013        | 0.094        | 0.008        | -            | 0.261        |
|                |        | Beta    | -0.234       | -0.284       | 0.334        | 0.290        |              | -0.041       |
|                |        | P value | 0.097        | 0.066        | 0.067        | 0.328        |              | 0.783        |
| <b>DLB</b>     | CSF    | B       | <0.001       | 0.002        | -0.043       | -0.001       | 0.233        | 0.042        |
|                |        | 95% CI  | -0.002-0.001 | -0.026-0.030 | -0.298-0.211 | -0.029-0.027 | -0.213-0.679 | -0.228-0.312 |
|                |        | SE      | 0.001        | 0.014        | 0.125        | 0.013        | 0.219        | 0.135        |
|                |        | Beta    | -0.033       | 0.020        | -0.061       | -0.019       | 0.186        | 0.040        |
|                |        | P value | 0.797        | 0.880        | 0.731        | 0.938        | 0.295        | 0.755        |
|                | Plasma | B       | <0.001       | 0.021        | -0.108       | -0.018       | 0.231        | 0.108        |
|                |        | 95% CI  | -0.003-0.004 | -0.026-0.069 | -0.429-0.213 | -0.063-0.027 | -0.450-0.912 | -0.358-0.574 |
|                |        | SE      | 0.002        | 0.023        | 0.153        | 0.020        | 0.319        | 0.228        |
|                |        | Beta    | 0.049        | 0.159        | -0.145       | -0.254       | 0.163        | 0.079        |
|                |        | P value | 0.770        | 0.364        | 0.488        | 0.400        | 0.480        | 0.639        |

List of abbreviations: PD Parkinson's disease; PDD PD dementia; DLB dementia with Lewy bodies; MSA multiple system atrophy; PSP/CBS progressive supranuclear palsy/corticobasal syndrome; LP lumbar puncture; MMSE Mini-mental state examination; UPDRS Unified Parkinson's Disease Rating Scale.

<sup>1</sup>Amyloid ratio evaluated as A $\beta$ 42/40 <0.65 (presence or absence).

## GUIDANCE CHECKLIST: STARD

| Section & Topic          | No         | Item                                                                                                                                                     | Reported on page # |
|--------------------------|------------|----------------------------------------------------------------------------------------------------------------------------------------------------------|--------------------|
| <b>TITLE OR ABSTRACT</b> |            |                                                                                                                                                          |                    |
|                          | <b>1</b>   | Identification as a study of diagnostic accuracy using at least one measure of accuracy<br>(such as sensitivity, specificity, predictive values, or AUC) | 1                  |
| <b>ABSTRACT</b>          |            |                                                                                                                                                          |                    |
|                          | <b>2</b>   | Structured summary of study design, methods, results, and conclusions<br>(for specific guidance, see STARD for Abstracts)                                | 2                  |
| <b>INTRODUCTION</b>      |            |                                                                                                                                                          |                    |
|                          | <b>3</b>   | Scientific and clinical background, including the intended use and clinical role of the index test                                                       | 3                  |
|                          | <b>4</b>   | Study objectives and hypotheses                                                                                                                          | 3                  |
| <b>METHODS</b>           |            |                                                                                                                                                          |                    |
| <i>Study design</i>      | <b>5</b>   | Whether data collection was planned before the index test and reference standard were performed (prospective study) or after (retrospective study)       | 4                  |
| <i>Participants</i>      | <b>6</b>   | Eligibility criteria                                                                                                                                     | 4                  |
|                          | <b>7</b>   | On what basis potentially eligible participants were identified<br>(such as symptoms, results from previous tests, inclusion in registry)                | 4-5                |
|                          | <b>8</b>   | Where and when potentially eligible participants were identified<br>(setting, location and dates)                                                        | 4                  |
|                          | <b>9</b>   | Whether participants formed a consecutive, random or convenience series                                                                                  | 4                  |
| <i>Test methods</i>      | <b>10a</b> | Index test, in sufficient detail to allow replication                                                                                                    | 5-6                |
|                          | <b>10b</b> | Reference standard, in sufficient detail to allow replication                                                                                            | 5                  |
|                          | <b>11</b>  | Rationale for choosing the reference standard (if alternatives exist)                                                                                    | 3-5                |
|                          | <b>12a</b> | Definition of and rationale for test positivity cut-offs or result categories<br>of the index test, distinguishing pre-specified from exploratory        | 5-6                |

|                     |            |                                                                                                                                                        |              |
|---------------------|------------|--------------------------------------------------------------------------------------------------------------------------------------------------------|--------------|
|                     | <b>12b</b> | Definition of and rationale for test positivity cut-offs or result categories of the reference standard, distinguishing pre-specified from exploratory | 5-6          |
|                     | <b>13a</b> | Whether clinical information and reference standard results were available to the performers/readers of the index test                                 | 6            |
|                     | <b>13b</b> | Whether clinical information and index test results were available to the assessors of the reference standard                                          | NA           |
| <i>Analysis</i>     | <b>14</b>  | Methods for estimating or comparing measures of diagnostic accuracy                                                                                    | 6            |
|                     | <b>15</b>  | How indeterminate index test or reference standard results were handled                                                                                | 5,6          |
|                     | <b>16</b>  | How missing data on the index test and reference standard were handled                                                                                 | NA           |
|                     | <b>17</b>  | Any analyses of variability in diagnostic accuracy, distinguishing pre-specified from exploratory                                                      | NA           |
|                     | <b>18</b>  | Intended sample size and how it was determined                                                                                                         | NA           |
| <b>RESULTS</b>      |            |                                                                                                                                                        |              |
| <i>Participants</i> | <b>19</b>  | Flow of participants, using a diagram                                                                                                                  | NA           |
|                     | <b>20</b>  | Baseline demographic and clinical characteristics of participants                                                                                      | 7            |
|                     | <b>21a</b> | Distribution of severity of disease in those with the target condition                                                                                 | 7 (Table 1)  |
|                     | <b>21b</b> | Distribution of alternative diagnoses in those without the target condition                                                                            | NA           |
|                     | <b>22</b>  | Time interval and any clinical interventions between index test and reference standard                                                                 | 7 (Table 1)  |
| <i>Test results</i> | <b>23</b>  | Cross tabulation of the index test results (or their distribution) by the results of the reference standard                                            | 10 (Table 3) |
|                     | <b>24</b>  | Estimates of diagnostic accuracy and their precision (such as 95% confidence intervals)                                                                | 10           |
|                     | <b>25</b>  | Any adverse events from performing the index test or the reference standard                                                                            | NA           |
| <b>DISCUSSION</b>   |            |                                                                                                                                                        |              |
|                     | <b>26</b>  | Study limitations, including sources of potential bias, statistical uncertainty, and generalisability                                                  | 15           |

|                          |    |                                                                                           |    |
|--------------------------|----|-------------------------------------------------------------------------------------------|----|
|                          | 27 | Implications for practice, including the intended use and clinical role of the index test | 15 |
| <b>OTHER INFORMATION</b> |    |                                                                                           |    |
|                          | 28 | Registration number and name of registry                                                  | NA |
|                          | 29 | Where the full study protocol can be accessed                                             | NA |
|                          | 30 | Sources of funding and other support; role of funders                                     | 16 |
